# Supplementary material for: Uniparental Genetic Heritage of Belarusians: Encounter of Rare Middle Eastern Matrilineages with a Central European Mitochondrial DNA Pool
Source: PLoS One. 2013 Jun 13;8(6):e66499. doi: 10.1371/journal.pone.0066499 (PMC3681942; doi:10.1371/journal.pone.0066499)
Supplement: Table S9 — Y-STR data used in Median-Joining Networks calculations. (XLSX) [file pone.0066499.s014.xlsx]

## Sheet: Sources of Y STRs
Table S9. Y-STR data used in Median-Joining Networks calculations.
	NRY haplogroup	Population (abbreviation in MJ network)	Sample size	References	Y STRs
	I2a(P37)	Belarusians (B)	97	This study	DYS19	DYS389I	DYS389II-I	DYS390	DYS391	DYS392	DYS393
	I2a(P37)	Russians (R)	77	Woźniak et al., 2010 (I2a )*	DYS19	DYS389I	DYS389II-I	DYS390	DYS391	DYS392	DYS393
	I-M423	Bosnians (Ba)	79	Battaglia et al., 2008	DYS19	DYS389I	DYS389II-I	DYS390	DYS391	DYS392	DYS393
	I-M423	Croatians (Ba)	36	Battaglia et al., 2008	DYS19	DYS389I	DYS389II-I	DYS390	DYS391	DYS392	DYS393
	I-M423	Slovenians (Ba)	15	Battaglia et al., 2008	DYS19	DYS389I	DYS389II-I	DYS390	DYS391	DYS392	DYS393
	I-M423	Poles (Po)	13	Battaglia et al., 2008	DYS19	DYS389I	DYS389II-I	DYS390	DYS391	DYS392	DYS393
	I-M423	Ukrainians (Uk)	15	Battaglia et al., 2008	DYS19	DYS389I	DYS389II-I	DYS390	DYS391	DYS392	DYS393
	I2a(P37)	Balts (Blt)	15	Lappalainen et al., 2008	DYS19	DYS389I	DYS389II-I	DYS390	DYS391	DYS392	DYS393
		Total	347
	N1c(Tat)	Belarusians (B)	54	This study	DYS19	DYS389I	DYS389II-I	DYS390	DYS391	DYS392	DYS393
	N1c(Tat)	Russians (R)	57	Woźniak et al., 2010 (I2a )*	DYS19	DYS389I	DYS389II-I	DYS390	DYS391	DYS392	DYS393
	N1c(Tat)	Ukrainians (Uk)	1	Rootsi et al., 2007	DYS19	DYS389I	DYS389II-I	DYS390	DYS391	DYS392	DYS393
	N1c(Tat)	Slovaks (S)	6	Rootsi et al., 2007	DYS19	DYS389I	DYS389II-I	DYS390	DYS391	DYS392	DYS393
	N1c(Tat)	Estonians (Es)	40	Lappalainen et al., 2008	DYS19	DYS389I	DYS389II-I	DYS390	DYS391	DYS392	DYS393
	N1c(Tat)	Latvians (La)	47	Lappalainen et al., 2008	DYS19	DYS389I	DYS389II-I	DYS390	DYS391	DYS392	DYS393
	N1c(Tat)	Lithuanians (Li)	73	Lappalainen et al., 2008	DYS19	DYS389I	DYS389II-I	DYS390	DYS391	DYS392	DYS393
	N1c(Tat)	Finns from Karelia (Ka)	69	Lappalainen et al., 2008	DYS19	DYS389I	DYS389II-I	DYS390	DYS391	DYS392	DYS393
	N1c(Tat)	Komis (Priluzhski, Izhemski) (Ur)	51	Mirabal et al., 2009	DYS19	DYS389I	DYS389II-I	DYS390	DYS391	DYS392	DYS393
	N1c(Tat)	Udmurts (Ur)	1	Rootsi et al., 2007	DYS19	DYS389I	DYS389II-I	DYS390	DYS391	DYS392	DYS393
	N1c(Tat)	Maris (Ur)	1	Rootsi et al., 2007	DYS19	DYS389I	DYS389II-I	DYS390	DYS391	DYS392	DYS393
	N1c(Tat)	Bashkirs (Ur)	1	Rootsi et al., 2007	DYS19	DYS389I	DYS389II-I	DYS390	DYS391	DYS392	DYS393
	N1c(Tat)	Chuvashes (Ur)	1	Rootsi et al., 2007	DYS19	DYS389I	DYS389II-I	DYS390	DYS391	DYS392	DYS393
		Total	402
	* - NRY haplogroup was inferred using the Haplogroup predictor online software (http://www.hprg.com/hapest5/)
References:
1. Battaglia V, Fornarino S, Al-Zahery N, Olivieri A, Pala M, et al. (2009) Y-chromosomal evidence of the cultural diffusion of agriculture in Southeast Europe. Eur J Hum Genet 17: 820–830.
2. Lappalainen T, Laitinen V, Salmela E, Andersen P, Huoponen K, et al. (2008) Migration waves to the Baltic Sea region. Ann Hum Genet 72: 337–348.
3. Mirabal S, Regueiro M, Cadenas AM, Cavalli-Sforza LL, Underhill PA, et al. (2009) Y-chromosome distribution within the geo-linguistic landscape of northwestern Russia. Eur J Hum Genet 17: 1260–1273.
4. Rootsi S, Zhivotovsky LA, Baldovic M, Kayser M, Kutuev IA, et al. (2007) A counter-clockwise northern route of the Y-chromosome haplogroup N from Southeast Asia towards Europe. Eur J Hum Genet 15: 204–211.
5. Woźniak M, Malyarchuk B, Derenko M, Vanecek T, Lazur J, et al. (2010) Similarities and distinctions in Y chromosome gene pool of Western Slavs. Am J Phys Anthropol 142: 540–548.
