# Supplementary material for: Uniparental Genetic Heritage of Belarusians: Encounter of Rare Middle Eastern Matrilineages with a Central European Mitochondrial DNA Pool
Source: PLoS One. 2013 Jun 13;8(6):e66499. doi: 10.1371/journal.pone.0066499 (PMC3681942; doi:10.1371/journal.pone.0066499)
Supplement: Table S10 — MtDNA haplogroups defining control (HVS-I: 16000–16400) and coding-region mutations relative to the RSRS and rCRS. (XLSX) [file pone.0066499.s015.xlsx]

## Sheet: RSRS
Table S10. MtDNA haplogroups defining control (HVSI: 16000-16400) and coding-region mutations relative to the RSRS.
Haplogroup	Control-region (from 16000 to 16400 nps) motifs	Coding-region mutation
С*	A16129G-T16187C-C16189T-G16230A-T16278C-T16298C-C16311T-C16327T	G8584A
C5	A16129G-T16187C-C16189T-G16230A-T16278C-T16288C-T16298C-C16311T-C16327T
D4b1	A16129G-T16187C-C16189T-G16230A-T16278C-C16311T-G16319A-T16362C	G8020A
G*	A16129G-T16187C-C16189T-G16230A-T16278C-C16311T-T16362C	C10400T
H*	A16129G-T16187C-C16189T-T16223C-G16230A-T16278C-C16311T	T7028C
H1*	A16129G-T16187C-C16189T-T16223C-G16230A-T16278C-C16311T	G3010A
H1a	A16129G-A16162G-T16187C-C16189T-T16223C-G16230A-T16278C-C16311T
H1b	A16129G-T16187C-T16189C!-T16223C-G16230A-T16278C-C16311T-T16356C
H2*	A16129G-T16187C-C16189T-T16223C-G16230A-T16278C-C16311T	G1438A
H2a1	A16129G-T16187C-C16189T-T16223C-G16230A-T16278C-C16311T-C16354T	G4769A
H2a2	A16129G-T16187C-C16189T-T16223C-G16230A-T16278C-C16311T	G750A
H4	A16129G-T16187C-C16189T-T16223C-G16230A-T16278C-C16311T	T5004C
H5	A16129G-T16187C-C16189T-T16223C-G16230A-T16278C-T16304C-C16311T	C456T
H6	A16129G-T16187C-C16189T-T16223C-G16230A-T16278C-C16311T-T16362C	A16482G
H10	A16129G-T16187C-C16189T-T16223C-G16230A-T16278C-C16311T	T14470a
H11	A16129G-T16187C-C16189T-T16223C-G16230A-T16278C-T16311C!	T8448C
H13a1	A16129G-T16187C-C16189T-T16223C-G16230A-T16278C-C16311T	A4745G
HV*	A16129G-T16187C-C16189T-T16223C-G16230A-T16278C-C16311T	T7028C, T14766C
HV0*	A16129G-T16187C-C16189T-T16223C-G16230A-T16278C-T16298C -C16311T
HV0a1	T16126C-A16129G-T16187C-C16189T-T16223C-G16230A-T16278C-T16298C -C16311T	C15904T
V	A16129G-T16187C-C16189T-T16223C-G16230A-T16278C-T16298C -C16311T	G4580A
HV1	C16067T -A16129G-T16187C-C16189T-T16223C-G16230A-T16278C-C16311T
HV4a2	G16129A!-T16187C-C16189T-C16221T -T16223C-G16230A-T16278C-C16311T
HV5	A16129G-T16187C-C16189T-T16223C-G16230A-T16278C-T16311C!
I1a	G16129A!-T16172C-T16187C-C16189T-G16230A-T16278C-T16311C!-G16391A	T10034C
J1*	C16069T -T16126C -A16129G-T16187C-C16189T-T16223C-G16230A-T16278C-C16311T	G3010A
J1b1a	C16069T -T16126C -A16129G-G16145A -T16172C -T16187C-C16189T-C16222T-T16223C-G16230A-C16261T -T16278C-C16311T
J1c*	C16069T -T16126C -A16129G-T16187C-C16189T-T16223C-G16230A-T16278C-C16311T	T14798C
J1c7a	C16069T -T16092C-T16126C -A16129G-T16187C-C16189T-T16223C-G16230A-T16278C-C16311T-C16261T
J2	C16069T -T16126C -A16129G-T16187C-C16189T-T16223C-G16230A-T16278C-C16311T	G15257A
K1*	A16129G-T16187C-C16189T-T16223C-T16224C-G16230A-T16278C-T16311C!	A10398G!
K1a1	T16093C-A16129G-T16187C-C16189T-T16223C-T16224C-G16230A-T16278C-T16311C!
K1b1a	A16129G-T16187C-C16189T-T16223C-T16224C-G16230A-T16278C-T16311C!-G16319A
K2	A16129G-T16187C-C16189T-T16223C-T16224C-G16230A-T16278C-T16311C!	T9716C
M10a1	G16129A!-T16187C-C16189T-G16230A-T16278C-T16311C!	G10646A
N1	A16129G-T16187C-C16189T-G16230A-T16278C-C16311T	G12501A
N3	T16086C-A16129G-T16172C-C16187T!-T16198C!-T16217C-G16230A-T16278C-C16311T
T1*	T16126C -A16129G-A16163G-T16187C-T16189C!-T16223C-G16230A-T16278C-C16294T-C16311T	C12633a
T1a	T16126C -A16129G-A16163G-C16186T-T16187C-T16189C!-T16223C-G16230A-T16278C-C16294T-C16311T
T1b	T16126C -A16129G-T16187C-T16189C!-T16223C-G16230A-T16243C -T16278C-C16294T-C16311T
T2*	T16126C -A16129G-T16187C-C16189T-T16223C-G16230A-T16278C-C16294T-C16296T -C16311T	A14233G
T2b	T16126C -A16129G-T16187C-C16189T-T16223C-G16230A-T16278C-C16294T-C16296T -T16304C-C16311T
U*	A16129G-T16187C-C16189T-T16223C-G16230A-T16278C-C16311T	A12308G
U1a	A16129G-T16187C-C16189T-T16223C-G16230A-T16278C-C16311T	G15148A
U2e	A16051G -G16129c-T16187C-T16189C!-T16223C-G16230A-T16278C-C16311T-T16362C	T5426C
U3	A16129G-T16187C-C16189T-T16223C-G16230A-T16278C-C16311T-A16343G
U4*	A16129G-T16187C-C16189T-T16223C-G16230A-T16278C-C16311T-T16356C	T4646C
U4a2b	A16129G-T16187C-C16189T-C16223T!-G16230A-T16278C-C16311T-T16356C
U5a*	A16129G-T16187C-C16189T-C16192T-T16223C-G16230A-C16256T-C16270T -T16278C-C16311T
U5a1	A16129G-T16187C-C16189T-C16192T-T16223C-G16230A-C16256T-C16270T -T16278C-C16311T-A16399G
U5a2a	C16114a-A16129G-T16187C-C16189T-C16192T-T16223C-G16230A-C16256T-C16270T -T16278C- G16526A -C16294T-C16311T
U5b*	A16129G-T16187C-C16189T-T16223C-G16230A-C16270T -T16278C-C16311T
U5b1b1a	A16129G-T16144C -T16187C-T16189C!-T16192C! -T16223C-G16230A-C16270T -T16278C-C16311T
U5b2	A16129G-T16187C-C16189T-T16223C-G16230A-C16270T -T16278C-C16311	A13637G
U7	A16129G-T16187C-C16189T-T16223C-G16230A-T16278C-C16311T-A16318t
W	A16129G-T16187C-C16189T-G16230A-T16278C-C16292T-C16311T	G8994A
X	A16129G-T16187C-T16189C!-G16230A-C16278T!-C16311T	T14470C
Notes	Nucleotide position numbers are relative to the RSRS (Behar et al., 2012, mtDNA tree Build 15 (30 Sep 2012)).
	An exclamation mark (!) refers to a back mutation to the ancestral state; nucleotides, given in upper case are transitions, and in lower case are transversions (following the PhyloTree symbolics).
	Control-region positions specific for certain haplogroups are highlighted in bold.

## Sheet: rCRS
Table S10. MtDNA haplogroups defining control (HVSI: 16000, 16400) and coding-region mutations relative to the rCRS.
Haplogroup	Control-region (from 16000 to 16400 nps) motifs (minus 16000)	Coding-region mutation
С*	223, 298, 327	8584A
C5	223, 288, 298, 327
D4b1	223, 319, 362	G8020A
G*	223, 278, 362	10400T
H*		7028C
H1*		3010A
H1a	162
H1b	189, 356
H2*		1438G
H2a1	354	4769G
H2a2		750G
H4		5004C
H5	304	456T
H6	362	16482G
H10		14470A
H11	311	8448C
H13a1		4745G
HV*		7028C,14766C
HV0*	298
HV0a1	126, 298	15904T
V	298	4580A
HV1	67
HV4a2	129, 221
HV5	311
I1a	129, 172, 223, 311, 391	10034C
J1*	69, 126	3010A
J1b1a	69, 126, 145, 172, 222, 261
J1c*	69126	14798C
J1c7a	69, 92, 126, 261
J2	69, 126	15257A
K1*	224, 311	10398G
K1a1	93, 224, 311
K1b1a	224, 311, 319
K2	224, 311	9716T
M10a1	129, 223, 311, 357	10646A
N1	223	12501A
N3	86, 172, 187, 189, 217, 223
T1*	126, 163, 189, 294	12633A
T1a	126, 163, 186, 189, 294
T1b	126, 189, 243, 294
T2*	126, 294, 296	14233G
T2b	126, 294, 296, 304
U*		12308G
U1a		15148A
U2e	51, 129(C), 189, 362	5426C
U3	343
U4*	356	4646C
U4a2b	223, 356
U5a*	192, 256, 270
U5a1	192, 256, 270, 399
U5a2a	114(A), 192, 256, 270, 294
U5b*	270
U5b1b1a	144, 189, 270
U5b2	270	13637G
U7	318(T)
W	223, 292	8994A
X	189, 223, 278	14470C
Notes	Nucleotide position numbers are relative to the rCRS (Andrews et al., 1999, mtDNA tree Build 15 (30 Sep 2012));
	positions of HVSI are transitions, transversions are specified in parentheses; coding region diagnostic positions are accompanied by defining nucleotide relatively to rCRS (Andrews et al., 1999)
